# Supplementary material
Source: PubMed Central journal article supplement (PMC4731292)
Supplement: supp_WNL.0000000000002208_Figure_e-1.pdf [file supp_WNL.0000000000002208_Figure_e-1.pdf]

Figure e-1: Serum AQP4-IgG antibody end-point titres in seven NMOSD patients.

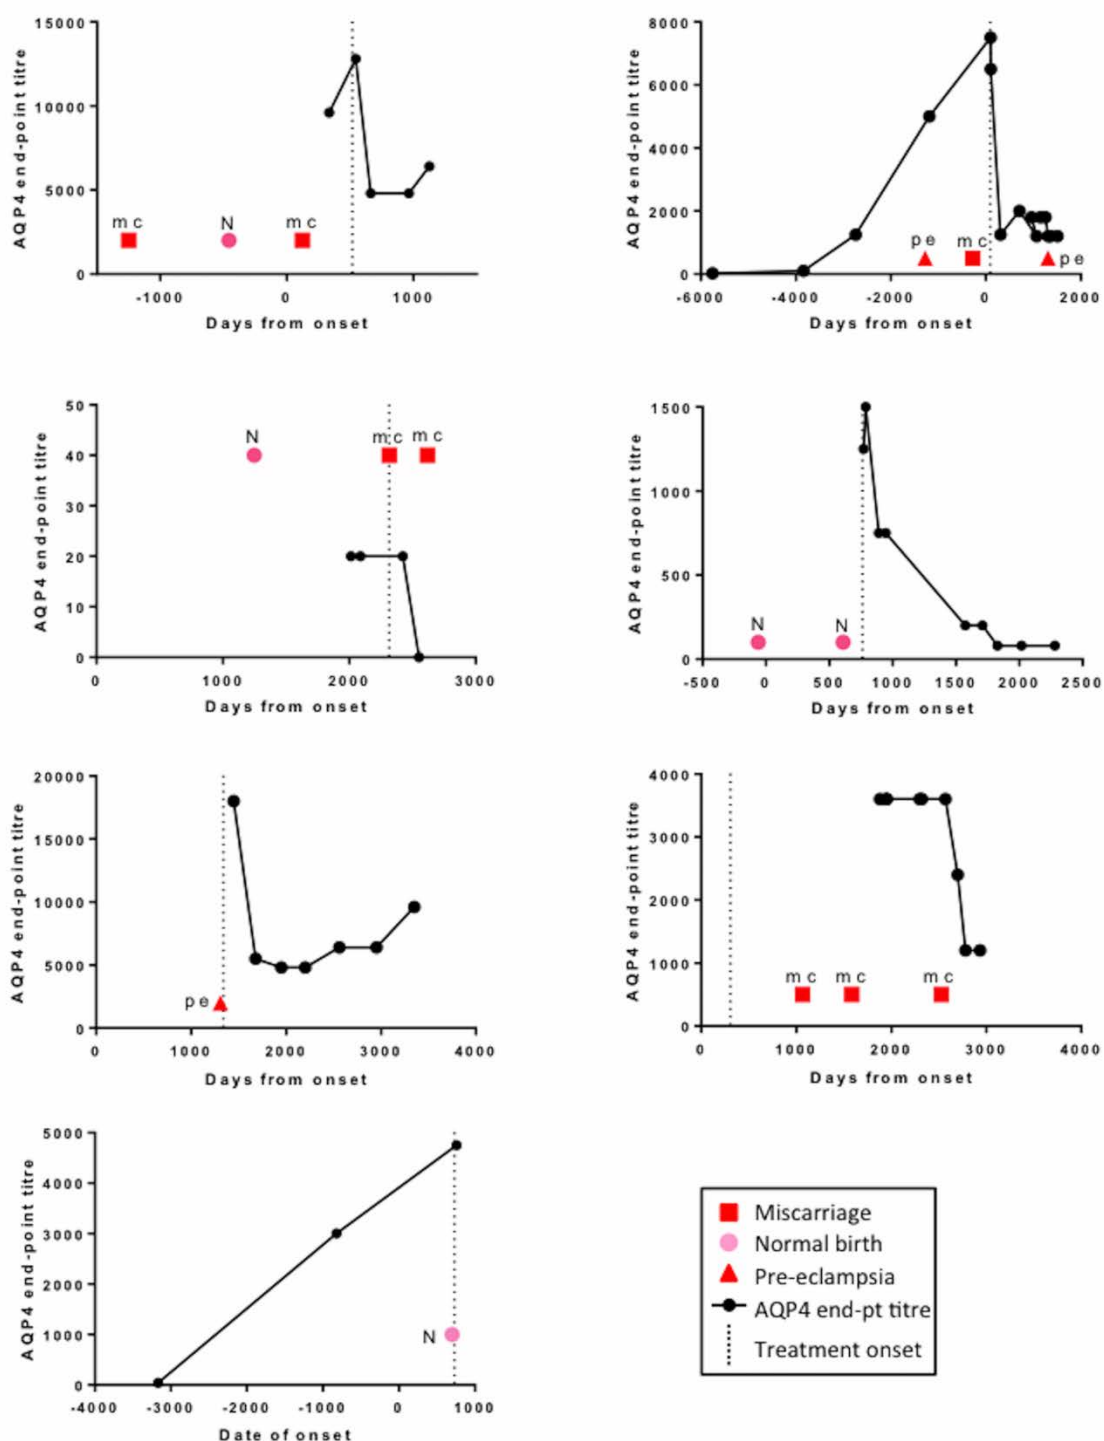

The end-point titres are plotted (connected black circles) against time in days from NMOSD onset (day 0). Pregnancy outcome is plotted as miscarriage (red square), viable birth (pink circle) or preeclampsia (red triangle). The vertical dotted line indicates initiation of immunosuppressive therapy, which has not been interrupted in any patient. Note the variation in scale in the Y-axis, which also reflects variation in the antibody titres between patients.
