# Supplementary material
Source: PubMed Central journal article supplement (PMC4731292)
Supplement: supp_WNL.0000000000002208_Figure_e-3.pdf [file supp_WNL.0000000000002208_Figure_e-3.pdf]

**Figure e-3: Overlap between the distribution of maternal age at pregnancy (white) and ages of NMOSD onset (grey).**

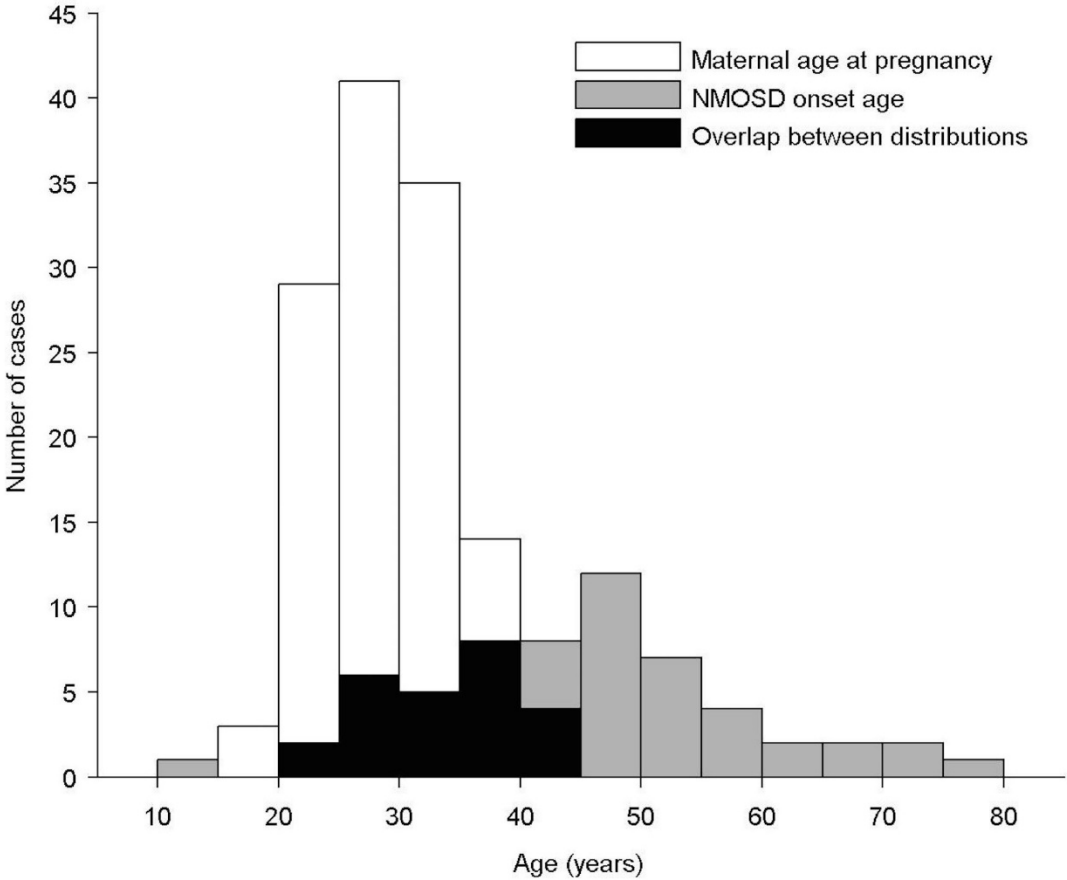

Black columns correspond to the region of overlap between the two distributions.
