# Supplementary material
Source: PubMed Central journal article supplement (PMC4731292)
Supplement: supp_WNL.0000000000002208_Figure_e-4.pdf [file supp_WNL.0000000000002208_Figure_e-4.pdf]

**Figure e-4: The relationship between pregnancy outcome, NMOSD disease activity and immunosuppression in the 15 women who had at least one pregnancy after NMOSD onset, or within 1 year of disease onset.**

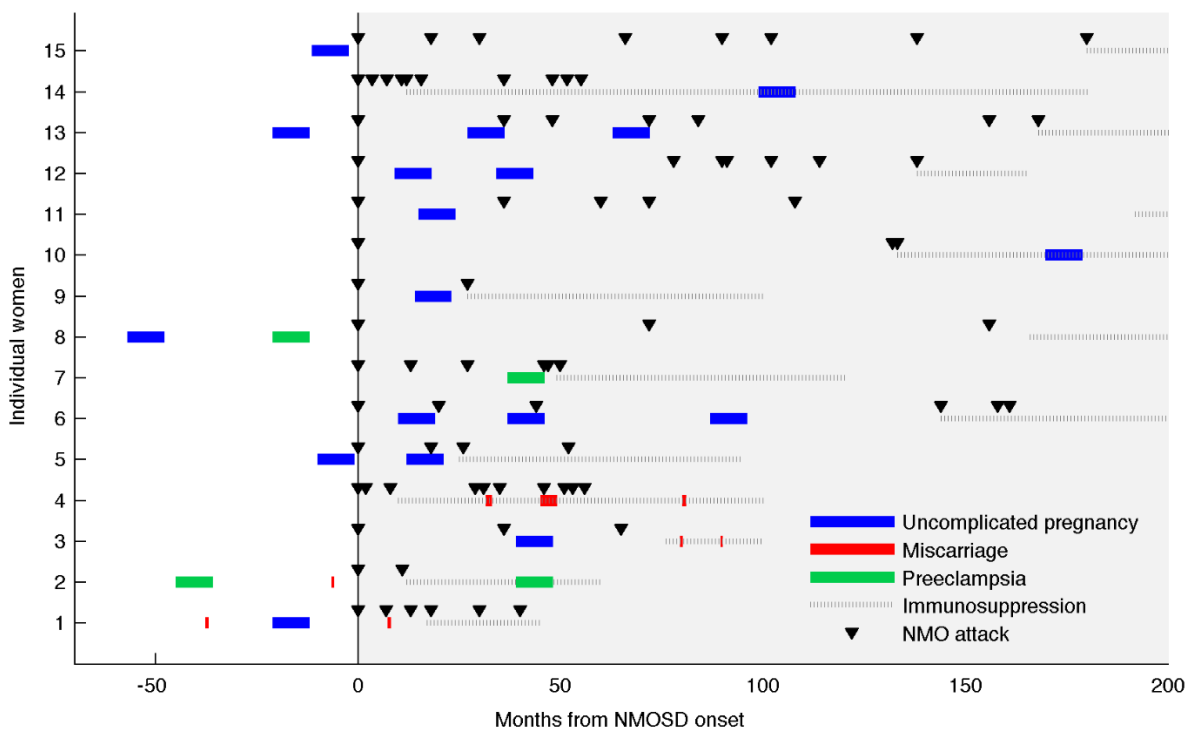

Numbers on the vertical axis correspond to individual women (patients 1-9 included in the miscarriage analysis; patients 1-3 and 5-15 included in preeclampsia analysis, as outlined in Methods section). Blue lines represent uncomplicated viable pregnancy (length = 9 months). Red lines represent miscarriage (length = pregnancy duration). Green lines represent viable pregnancy complicated by preeclampsia (length = 9 months). Black triangles represent NMOSD disease attack. Grey shaded area represents period after NMOSD onset. Grey dashed lines represent ongoing immunosuppression (each line starts at the beginning of the treatment and stops at the last follow up. Details for individual cases where maintenance immunosuppression was given during the whole course of pregnancy are as follows: Woman 2: azathioprine 250 mg/day and prednisolone 20 mg/day; Woman 3: prednisolone 5-10 mg/day; Woman 4: azathioprine 150 mg/day; Woman 10: prednisolone 5 mg/day; Woman 14: azathioprine 100 mg/day and prednisolone 5 mg/day.
