# Supplementary material
Source: PubMed Central journal article supplement (PMC4731292)
Supplement: supp_WNL.0000000000002208_Tables_e-1-3.pdf [file supp_WNL.0000000000002208_Tables_e-1-3.pdf]

## Supplemental / Web tables

**Table e-1: NMOSD characteristics summary**

ON = optic neuritis. TM = Transverse myelitis. LETM = Longitudinally extensive transverse myelitis. \* Some patients received more than one treatment because intolerance or lack of response to the first agent.

| Characteristic                                                                  | Values      |
|---------------------------------------------------------------------------------|-------------|
| Number of women                                                                 | 60          |
| Mean age (years) at NMOSD onset (SD)                                            | 46.4 (13.1) |
| NMOSD onset – presenting features                                               |             |
| Brain                                                                           | 1           |
| Brainstem                                                                       | 5           |
| Brainstem + brain + ON or TM                                                    | 5           |
| Bilateral optic neuritis                                                        | 2           |
| Optic neuritis                                                                  | 23          |
| Optic neuritis + LETM                                                           | 2           |
| TM/LETM                                                                         | 22          |
| Form of disease – subgroup within NMOSD                                         |             |
| Brain/brainstem                                                                 | 2           |
| NMO + brain/brainstem                                                           | 5           |
| NMO                                                                             | 21          |
| Optic neuritis (single & recurrent)                                             | 10 (1 & 9)  |
| TM/LETM (single & recurrent)                                                    | 22 (4 & 18) |
| Mean time (months) to start immunosuppressive treatment from disease onset (SD) | 47.2 (57.5) |

|                                                           |       |
|-----------------------------------------------------------|-------|
| Immunosuppressive treatments (taken for $\geq 3$ months)* |       |
| Prednisolone alone                                        | 25    |
| Azathioprine +/- prednisolone                             | 27    |
| Methotrexate +/- prednisolone                             | 7     |
| Mycophenolate mofetil +/- prednisolone                    | 4     |
| Cyclosporine + prednisolone                               | 2     |
| Rituximab +/- prednisolone                                | 3     |
| Mitoxantrone                                              | 2     |
| Mean annual relapse rate before treatment                 | 0.77  |
| Mean annual relapse rate during treatment                 | 0.2   |
| Evidence of $\geq 1$ other autoimmune disorder            | 63.3% |
| Evidence of $\geq 2$ other autoimmune disorders           | 16.7% |

**Table e-2: Cohort obstetric details**

| <b>Characteristic</b>                                             | <b>Values</b> |
|-------------------------------------------------------------------|---------------|
| Number of women                                                   | 60            |
| Number of pregnancies                                             | 126           |
| Mean age (years) at pregnancy (SD)                                | 28.5 (5.48)   |
| Mean number of pregnancies per woman (range)                      | 2.43 (1-4)    |
| Mean no. of years that pregnancy precedes NMOSD onset (SD)        | 16.1 (14.2)   |
| No. of pregnancies after NMOSD (in cohort of 126 pregnancies)     | 22 (17.5%)    |
| Number of miscarriages (in cohort of 85 informative pregnancies)  | 11 (12.9%)    |
| Number of preeclampsia (in cohort of 113 informative pregnancies) | 13 (11.5%)    |

**Table e-3: Multivariate Logistic Regression for variables associated with increased risk of preeclampsia.**

| <b>Independent Variable</b><br><i>(n = no. preeclampsia / eligible pregnancies)</i> | <b>Odds Ratio</b> | <b>95%-CI</b> | <b>P val (*sig)</b> |
|-------------------------------------------------------------------------------------|-------------------|---------------|---------------------|
| Miscarriage in last pregnancy (2/3)                                                 | 27.3              | 1.57 – 475    | *0.023              |
| ≥ 2 other autoimmune disorders (6/19)                                               | 8.01              | 1.03 – 62.6   | *0.047              |
