# Supplementary material
Source: PubMed Central journal article supplement (PMC4731292)

**Figure e-2: Cohort description.**

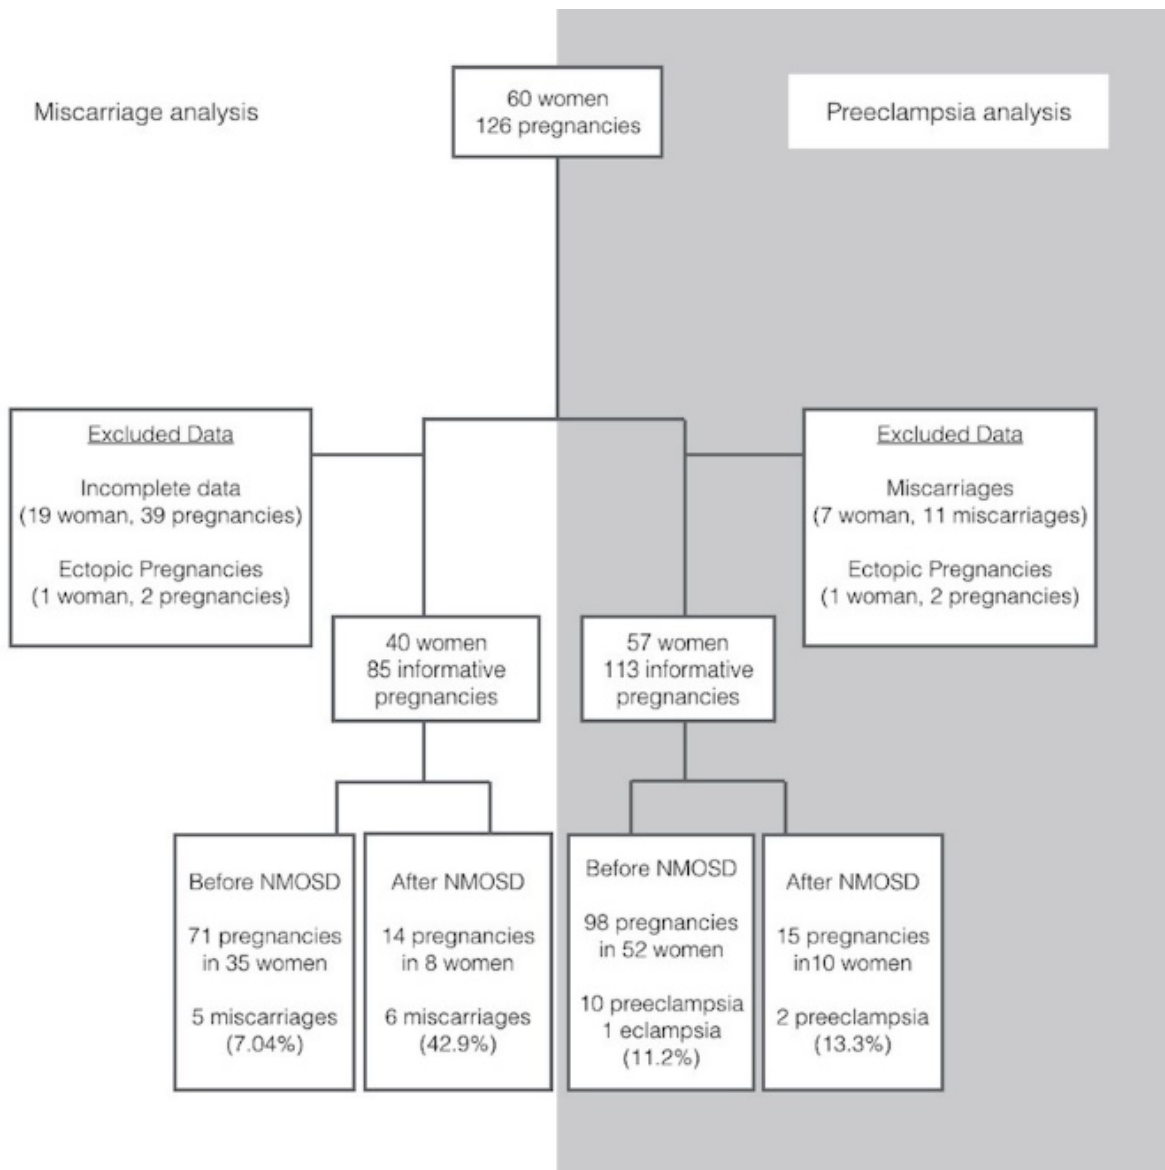

Supplement: supp_WNL.0000000000002208_Figure_e-2.pdf [file supp_WNL.0000000000002208_Figure_e-2.pdf]
